# Supplementary material for: KIF3C: an emerging biomarker with prognostic and immune implications across pan-cancer types and its experiment validation in gastric cancer
Source: publisher site journal article supplement (doi:10.18632/aging.205694), 2024-03-28
Supplement: Supplementary file [file aging-v16i7-205694-supplementary-material-SD1.pdf]

SUPPLEMENTARY FIGURE

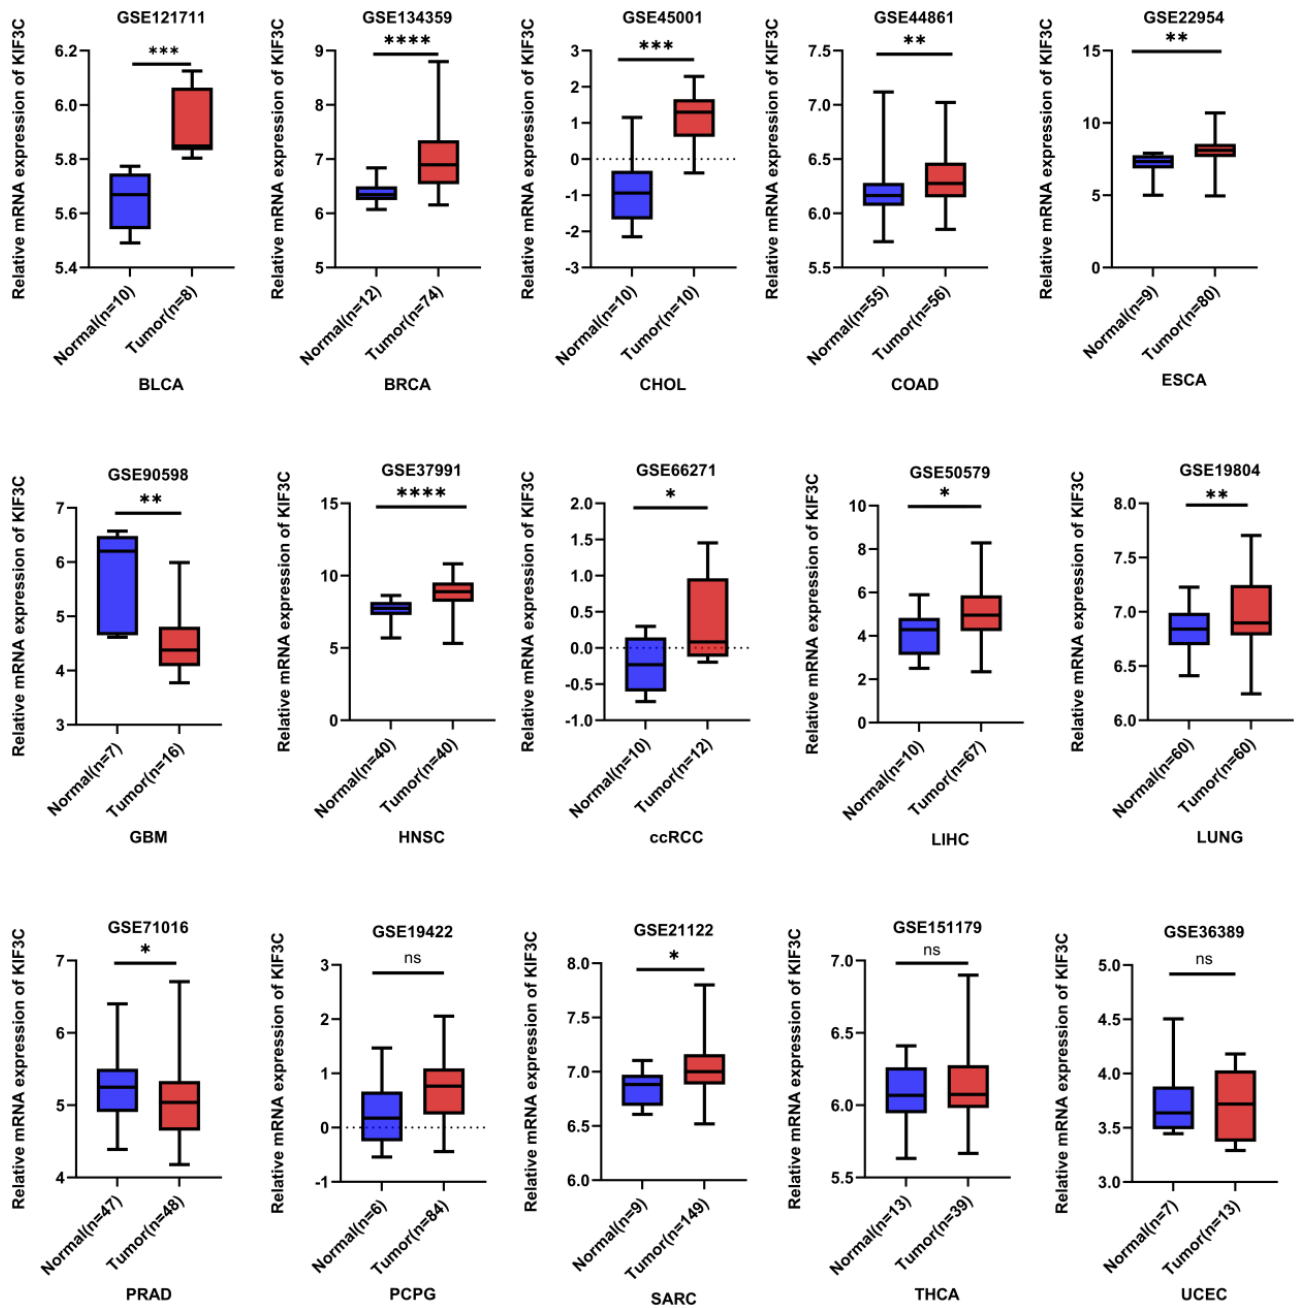

Supplementary Figure 1. The box plots of KIF3C expression levels in GEO.
